# Supplementary material for: Veratridine Can Bind to a Site at the Mouth of the Channel Pore at Human Cardiac Sodium Channel NaV1.5
Source: Int J Mol Sci. 2022 Feb 17;23(4):2225. doi: 10.3390/ijms23042225 (PMC8878851; doi:10.3390/ijms23042225)
Supplement: Supplementary file 1 [file ijms-23-02225-s001.zip]

Archive with 6 entries (6 files):
- FigS1.png
- FigS2.png
- FigS3.png
- FigS4.png
- FigS5.png
- ijms-1560702-supplementary.pdf
